# Supplementary material
Source: PubMed Central journal article supplement (PMC2941302)
Supplement: 1002335107_pnas.201002335SI.pdf [file 1002335107_pnas.201002335SI.pdf]

# Supporting Information

Saffo et al. 10.1073/pnas.1002335107

Table S1. Accession numbers of taxa used in phylogenetic analysis

| Taxa                                                | Accession no. |
|-----------------------------------------------------|---------------|
| <i>Adelina bambarooniae</i>                         | AF494059      |
| <i>Ascogregarina armigerei</i>                      | DQ462459      |
| <i>Atoxoplasma</i> sp.                              | AY331571      |
| <i>Babesia odocoilei</i>                            | AY237638      |
| <i>Besnoitia benneti</i>                            | AY665399      |
| <i>Cardiosporidium cionae</i>                       | EU052685      |
| <i>Caryospora bigenetica</i>                        | AF060975      |
| <i>Colpoda inflata</i>                              | M97908        |
| <i>Colpodella pontica</i>                           | AY078092      |
| <i>Colpodella tetrahymenae</i>                      | AF330214      |
| <i>Cryptosporidium baylei</i>                       | DQ898161      |
| <i>Cryptosporidium muris</i>                        | AY642591      |
| <i>Cryptosporidium parvum</i>                       | AF093492      |
| <i>Cryptosporidium serpentis</i>                    | AF093500      |
| <i>Cyclospora colobi</i>                            | AF111186      |
| <i>Cyclospora papionis</i>                          | AF111187      |
| <i>Cytauxzoon felis</i>                             | AF399930      |
| <i>Cystoisospora ohioensis</i>                      | AY618555      |
| <i>Eimeria adeneoodei</i>                           | AF324212      |
| <i>Eimeria antrozoi</i>                             | AF307876      |
| <i>Eimeria bovis</i>                                | U77084        |
| <i>Eimeria falciformis</i>                          | AF080614      |
| <i>Eimeria tenella</i>                              | U67121        |
| <i>Frenkelia glareoli</i>                           | AF009245      |
| <i>Frenkelia microti</i>                            | AF009244      |
| <i>Goussia janae</i>                                | AY043206      |
| <i>Gymnodinium sanguineum</i>                       | AJ415513      |
| <i>Hammondia hammondi</i>                           | AF096498      |
| <i>Hyaloklossia lieberkuehni</i>                    | AF298623      |
| Intrahemocytic apicomplexan from <i>Halocynthia</i> | EF558768      |
| <i>Isospora belli</i>                               | DQ060683      |
| <i>Isospora robini</i>                              | AF080612      |
| <i>Lankesteria minima</i>                           | AF080611      |
| <i>Monocystis agilis</i>                            | AF457127      |
| <i>Neospora caninum</i>                             | U16159        |
| <i>Ophryocystis elektroscirrha</i>                  | AF129883      |
| <i>Oxytricha nova</i>                               | X03948        |
| <i>Pfiesteria piscicida</i>                         | DQ991382      |
| <i>Piroplasmida</i> sp.                             | AF158709      |
| <i>Prorocentrum micans</i>                          | Y16233        |
| <i>Rhytidocystis polygordiae</i>                    | DQ273988      |
| <i>Sarcocystis cruzi</i>                            | AF017120      |
| <i>Sarcocystis gallotiae</i>                        | AY015112      |
| <i>Sarcocystis hirsute</i>                          | AF017122      |
| <i>Sarcocystis singaporensis</i>                    | AF434057      |
| <i>Selenidium terebellae</i>                        | AY196709      |
| <i>Theileria annulata</i>                           | M64243        |
| <i>Theileria lestoquardi</i>                        | AF081135      |
| <i>Theileria parva</i>                              | AF013418      |
| <i>Toxoplasma gondii</i>                            | M97703        |
| <i>Tridacna</i> symbiont                            | AB000912      |
| Uncultured alveolate                                | AF372780      |
| Unidentified <i>Monoastreaa</i> symbiont 1          | AF238264      |
| Unidentified <i>Monoastreaa</i> symbiont 2          | AF238265      |
| Unidentified <i>Monoastreaa</i> symbiont 3          | AF238266      |
